# Supplementary material for: Systematic Comparison of the Effects of Alpha-synuclein Mutations on Its Oligomerization and Aggregation
Source: PubMed Central journal article supplement (PMC4230739; doi:10.1371/journal.pgen.1004741), 2014-11-13
Supplement: pgen.1004741.s001.pdf [file pgen.1004741.s001.pdf]

| <b>Mutation</b> | <b>Primer</b>                                                                                                        |
|-----------------|----------------------------------------------------------------------------------------------------------------------|
| <b>A30P</b>     | Forward: 5'-GGGTGTGGCAGAAGCACCAGGAAAGACAAAAGA-3'<br>Reverse: 5'-TCTTTTGTCTTTCCTGGTGCTTCTGCCACACCC-3'                 |
| <b>E46K</b>     | Forward: 5'-TAGGCTCCAAAACCAAGAAGGGAGTGGTGCATGG-3'<br>Reverse: 5'-CCATGCACCACTCCCTTCTTGGTTTTGGAGCCTA-3'               |
| <b>H50Q</b>     | Forward: 5'-GGAGGGAGTGGTGCAGGGTGTGGCAACAG-3'<br>Reverse: 5'-CTGTTGCCACACCCTGCACCACTCCCTCC-3'                         |
| <b>G51D</b>     | Forward: 5'-GGGAGTGGTGCATGATGTGGCAACAGTGG-3'<br>Reverse: 5'-CCACTGTTGCCACATCATGCACCACTCCC-3'                         |
| <b>A53T</b>     | Forward: 5'-GAGTGGTGCATGGTGTGACGACAGTGGCTGAGAAGAC-3'<br>Reverse: 5'-GTCTTCTCAGCCACTGTCGTCACACCATGCACCACTC-3'         |
| <b>E35K</b>     | Forward: 5'-CAGAAGCAGCAGGAAAGACAAAAAAGGGTGTCTCT-3'<br>Reverse: 5'-AGAGAACACCCTTTTTTGTCTTTCCTGCTGCTTCTG-3'            |
| <b>E57K</b>     | Forward: 5' GTGGCAACAGTGGCTAAGAAGACCAAAGAGC 3'<br>Reverse: 5' GCTCTTTGGTCTTCTTAGCCACTGTTGCCAC 3'                     |
| <b>A56P</b>     | Forward: 5'-GGTGTGGCAACAGTGCCTGAGAAGACCAAAG-3'<br>Reverse: 5'-CTTTGGTCTTCTCAGGCACTGTTGCCACACC-3'                     |
| <b>A76P</b>     | Forward: 5'-TGACGGGTGTGACACCAGTAGCCCAGAAG-3'<br>Reverse: 5'-CTTCTGGGCTACTGGTGTACACCCGTCA-3'                          |
| <b>S129A</b>    | Forward: 5'CTTATGAAATGCCTGCTGAGGAAGGGTATC-3'<br>Reverse: 5'GATACCCTTCCTCAGCAGGCATTTTCATAAG-3'                        |
| <b>S129D</b>    | Forward: 5'-GGCTTATGAAATGCCTGATGAGGAAGGGTATCAAG-3'<br>Reverse: 5'-CTTGATACCCTTCCTCATCAGGCATTTTCATAAG CC-3'           |
| <b>S129G</b>    | Forward: 5'-GACAATGAGGCTTATGAAATGCCTGGTGGAGGAAGGGTATC-3'<br>Reverse: 5'-GATACCCTTCCTCACCAGGCATTTTCATAAGCCTCATTGTC-3' |
| <b>S87A</b>     | Forward: 5'-AAGACAGTGGAGGGAGCAGGGGCCATTGCAGCAG-3'<br>Reverse: 5'-CTGCTGCAATGGCCCCCTGCTCCCTCCACTGTCTT-3'              |
| <b>S87E</b>     | Forward: 5'-ACAGTGGAGGGAGCAGGGGAAATTGCAGCAGC-3'<br>Reverse: 5'-GCTGCTGCAATTTCCCCTGCTCCCTCCACTGT-3'                   |
| <b>Y125F</b>    | Forward: 5'-GGATCCTGACAATGAGGCTTTTGAAATGCCTTCTGA-3'<br>Reverse: 5'-TCAGAAGGCATTTCAAAGCCTCATTGTCAGGATCC-3'            |
| <b>Y125D</b>    | Forward: 5'-GATCCTGACAATGAGGCTGATGAAATGCCTTCTGAGG-3'<br>Reverse: 5'-CCTCAGAAGGCATTTTCATCAGCCTCATTGTCAGGATC-3'        |
| <b>K96R</b>     | Forward: 5'-GCCACTGGCTTTGTCAGAAAGGACCAGTTGGGC-3'<br>Reverse: 5'-GCCCAACTGGTCCTTTCTGACAAAGCCAGTGGC-3'                 |
| <b>K102R</b>    | Forward: 5'-AAGGACCAGTTGGGCAGGAATGAAGAAGGAGCC-3'<br>Reverse: 5'-GGCTCCTTCTTCATTCCTGCCCAACTGGTCCTT-3'                 |
