# Supplementary material for: Systematic Comparison of the Effects of Alpha-synuclein Mutations on Its Oligomerization and Aggregation
Source: PubMed Central journal article supplement (PMC4230739; doi:10.1371/journal.pgen.1004741), 2014-11-13
Supplement: pgen.1004741.s002.pdf [file pgen.1004741.s002.pdf]

| Mutation          | Effects on oligomerization |                          |         | Effects on aggregation |            |
|-------------------|----------------------------|--------------------------|---------|------------------------|------------|
|                   | Flow Cytometry             | Subcellular distribution |         | Number                 | Morphology |
|                   |                            | Nucleus                  | Cytosol |                        |            |
| <b>A30P</b>       | ↔                          | ↑                        | ↓       | ↓                      | ↔          |
| <b>E46K</b>       | ↔                          | ↔                        | ↔       | ↑                      | Mix        |
| <b>A53T</b>       | ↔                          | ↑                        | ↓       | ↔                      | ↔          |
| <b>H50Q</b>       | ↔                          | ↑                        | ↓       | ↑                      | ↔          |
| <b>G51D</b>       | ↔                          | ↑                        | ↓       | ↑                      | ↔          |
| <b>A56P</b>       | ↑                          | ↔                        | ↔       | ↓                      | ↔          |
| <b>A76P</b>       | ↑                          | ↔                        | ↔       | ↓                      | ↔          |
| <b>A30P/A76P</b>  | ↑                          | ↑                        | ↓       | ↓                      | ↔          |
| <b>TP</b>         | ↑                          | ↔                        | ↔       | ↓                      | ↔          |
| <b>E35K</b>       | ↑                          | ↔                        | ↔       | ↑                      | Mix        |
| <b>E57K</b>       | ↑                          | ↔                        | ↔       | ↑                      | Small      |
| <b>S87A</b>       | ↔                          | ↔                        | ↔       | ↔                      | ↔          |
| <b>S87E</b>       | ↓                          | ↔                        | ↔       | ↓                      | ↔          |
| <b>K96R/K102R</b> | ↑                          | ↔                        | ↔       | ↔                      | Mix        |
| <b>Y125D</b>      | ↔                          | ↔                        | ↔       | ↔                      | ↔          |
| <b>Y125F</b>      | ↔                          | ↔                        | ↔       | ↔                      | Mix        |
| <b>S129A</b>      | ↔                          | ↑                        | ↓       | ↔                      | ↔          |
| <b>S129G</b>      | ↔                          | ↔                        | ↔       | ↔                      | ↔          |
| <b>S129D</b>      | ↔                          | ↔                        | ↔       | ↔                      | ↔          |
