# Supplementary material for: Systematic Comparison of the Effects of Alpha-synuclein Mutations on Its Oligomerization and Aggregation
Source: PubMed Central journal article supplement (PMC4230739; doi:10.1371/journal.pgen.1004741), 2014-11-13

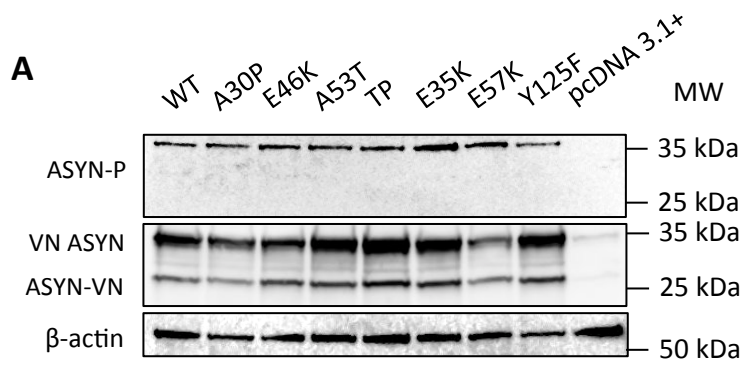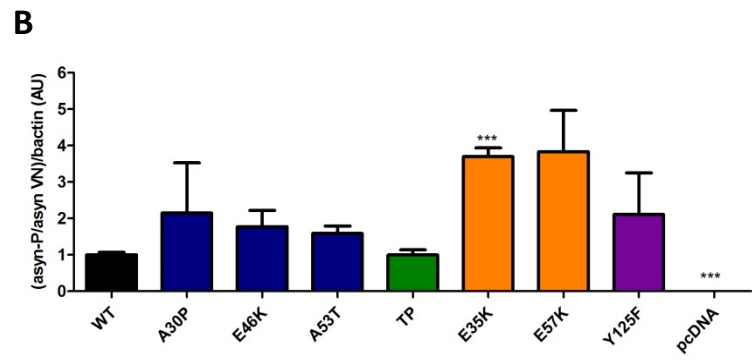

Supplement: pgen.1004741.s005.pdf [file pgen.1004741.s005.pdf]
